# Supplementary material for: Image learning to accurately identify complex mixture components
Source: Royal Society of Chemistry journal article supplement (doi:10.1039/d1an01288f), 2021-01-01
Supplement: d1an01288f1.pdf [file d1an01288f1.pdf]

### Electronic supplementary information

#### Image Learning to Accurately Identify Complex Mixture Components

Qiannan Duan, Jianchao Lee\*, Jiayuan Chen, Yunjin Feng, Run Luo, Can Wang, Sifan Bi, Fenli Liu,  
Wenjing Wang, Yicai Huang, Zhaoyi Xu

#### Table of Contents

Figures and tables:

|                 |    |
|-----------------|----|
| Figure S1 ..... | 2  |
| Figure S2 ..... | 3  |
| Figure S3 ..... | 4  |
| Figure S4 ..... | 5  |
| Figure S5 ..... | 6  |
| Figure S6 ..... | 7  |
| Table S1 .....  | 8  |
| Table S2 .....  | 9  |
| Table S3 .....  | 10 |
| Table S4 .....  | 11 |
| Table S5 .....  | 12 |

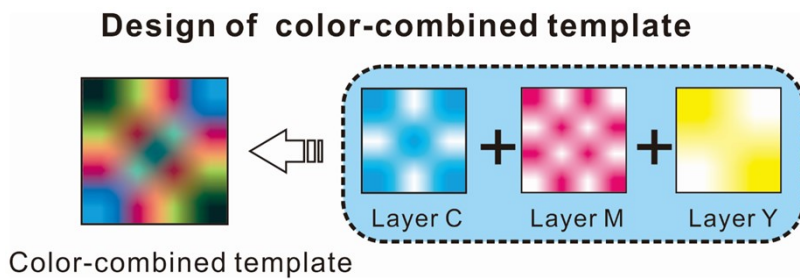

**Figure S1** A combined template (in size of 1200×1200 dpi) was designed for preparing the multi-color wave filtering chip. The template consisted of three overlapping C/M/Y color layers (referring to inks: cyan, magenta and yellow), which were combined by presetting the CMY values in various directions.

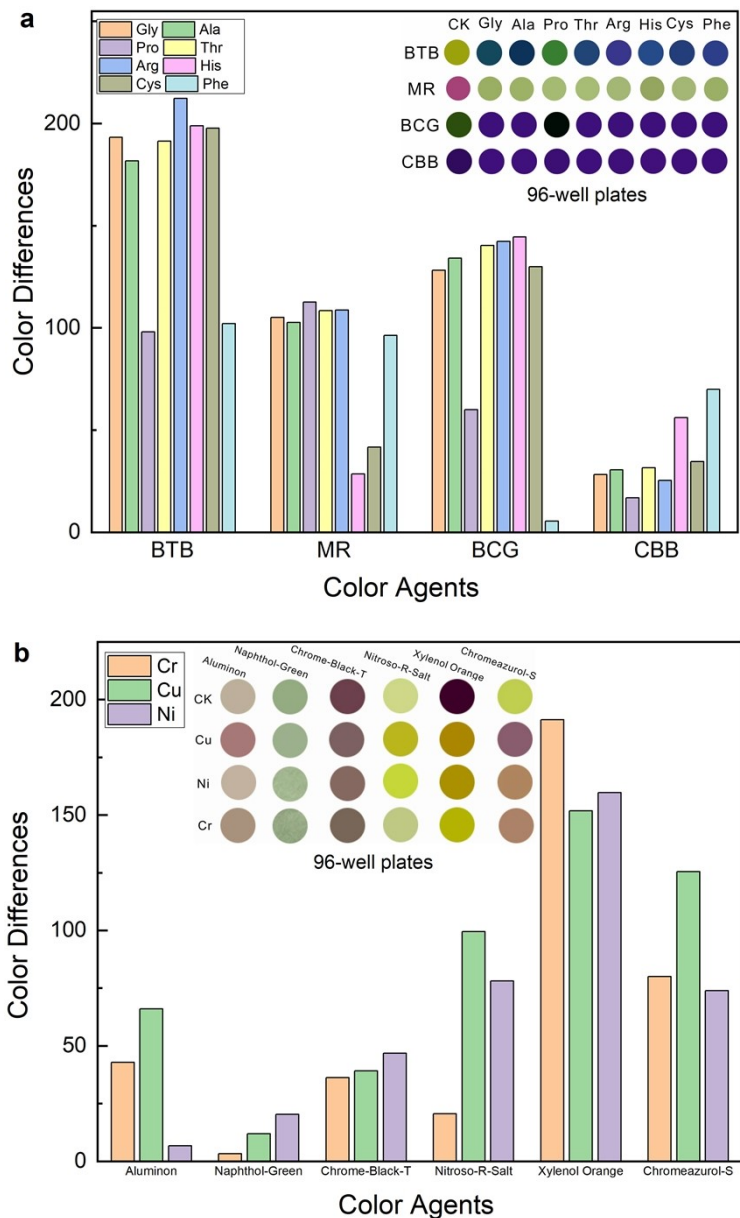

**Figure S2** Color differences between the reaction groups and CK groups. The color differences of (a) the selected AA chromogenic agents and (b) the selected heavy metal chromogenic agents.

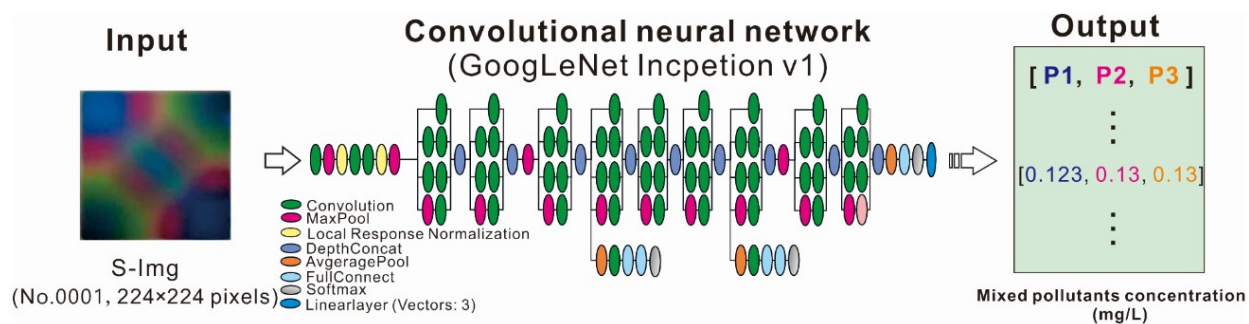

**Figure S3** A modified Inception v1 framework for predicting mixture concentrations by inputting the S-Img. Detailed architectures were shown in Table S5, and reprinted from [https://www.cv-foundation.org/openaccess/content\\_cvpr\\_2015/html/Szegedy\\_Going\\_Deeper\\_With\\_2015\\_CVPR\\_paper.html](https://www.cv-foundation.org/openaccess/content_cvpr_2015/html/Szegedy_Going_Deeper_With_2015_CVPR_paper.html).

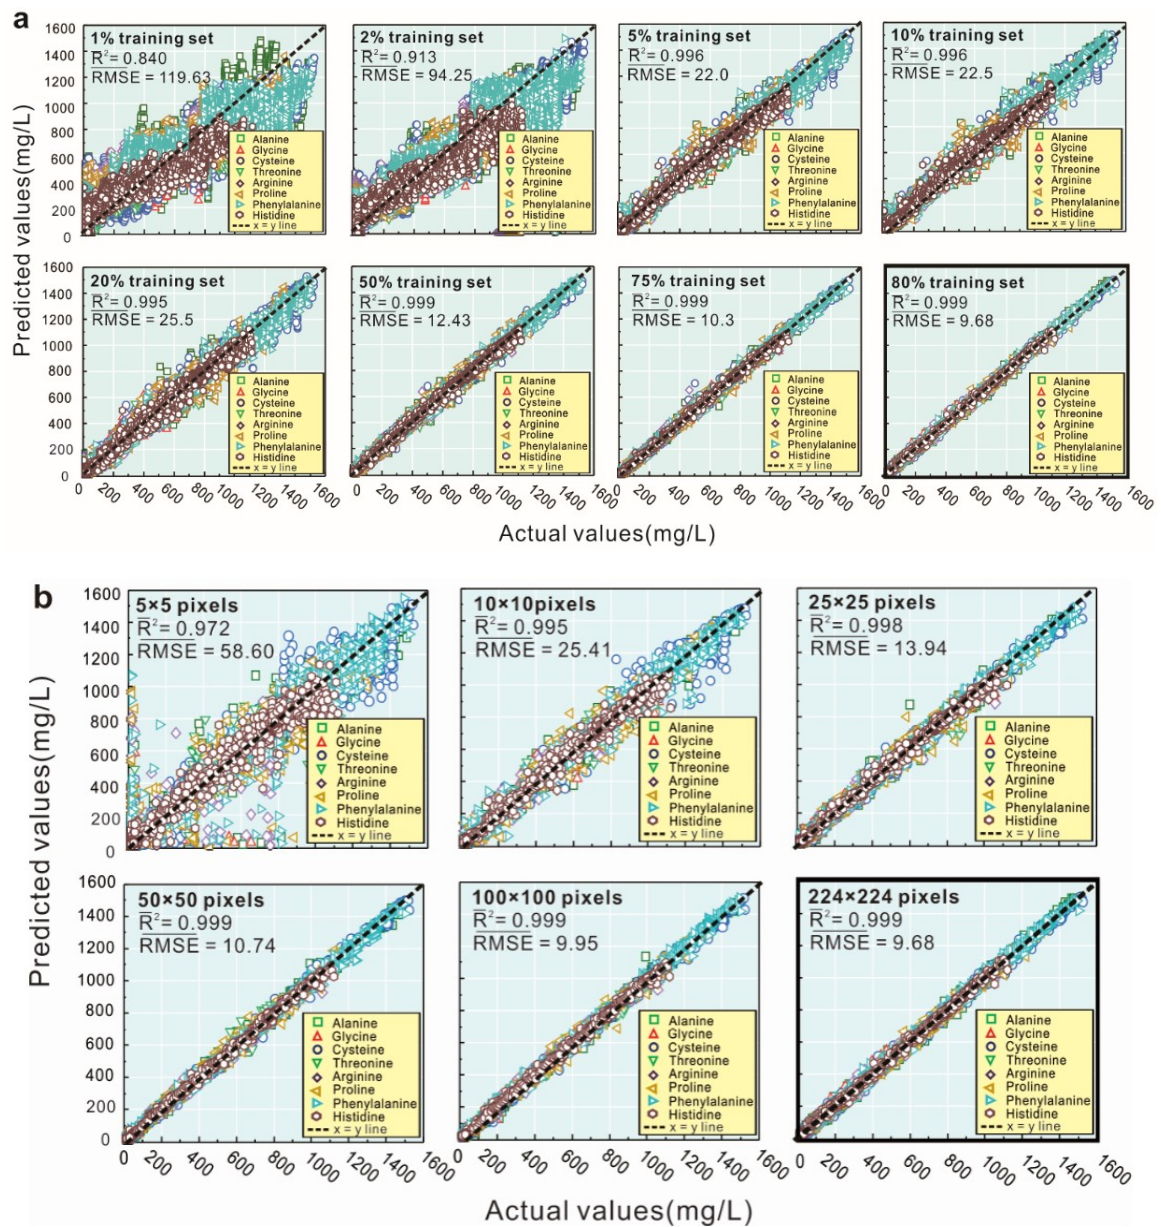

**Figure S4** Test set performances of the Inception V1 model. Scatter plots of (a) variable proportions of the training data, and (b) different image sizes. Evaluation parameters:  $R^2$  and RMSE; dashed line,  $y = x$  line. Mean  $R^2$  and RMSE of 8 AAs were remarked.



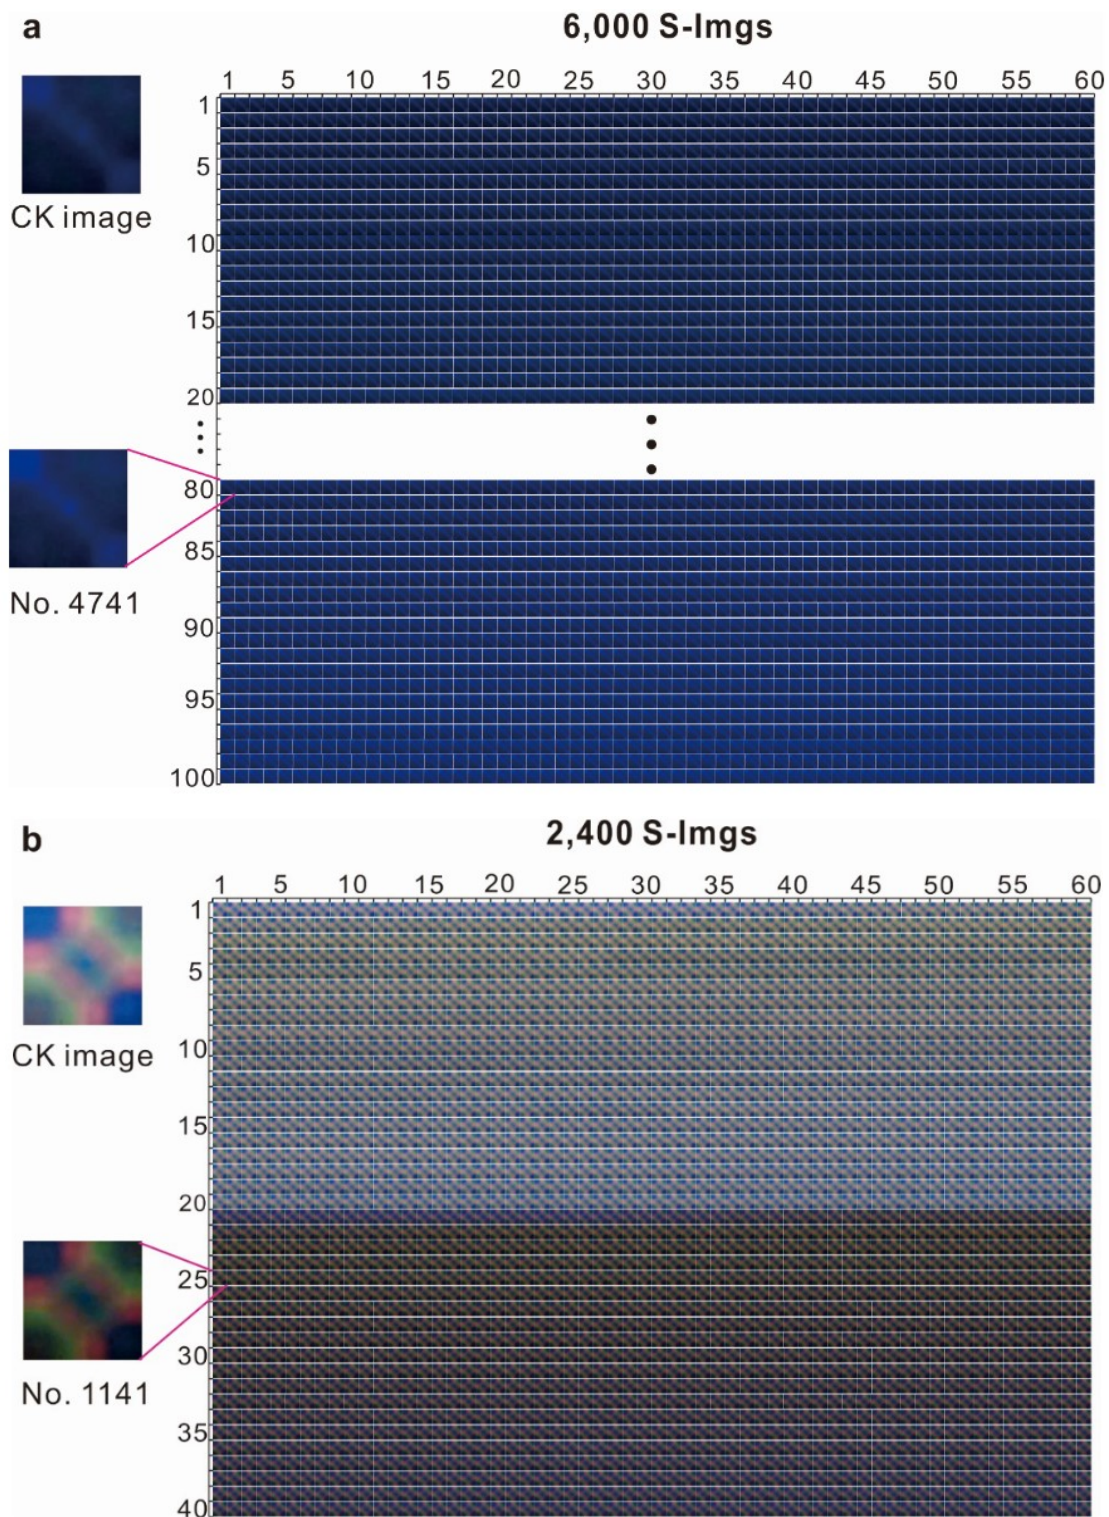

**Figure S5** (a) S-Img set collected from 6,000 urine samples (containing 5 AAs: threonine, proline, histidine, glycine and phenylalanine). (b) S-Img set collected from 2,400 soil solution samples (containing 3 heavy metal ions:  $\text{Ni}^{2+}$ ,  $\text{Cu}^{2+}$  and  $\text{Cr}^{3+}$ ).

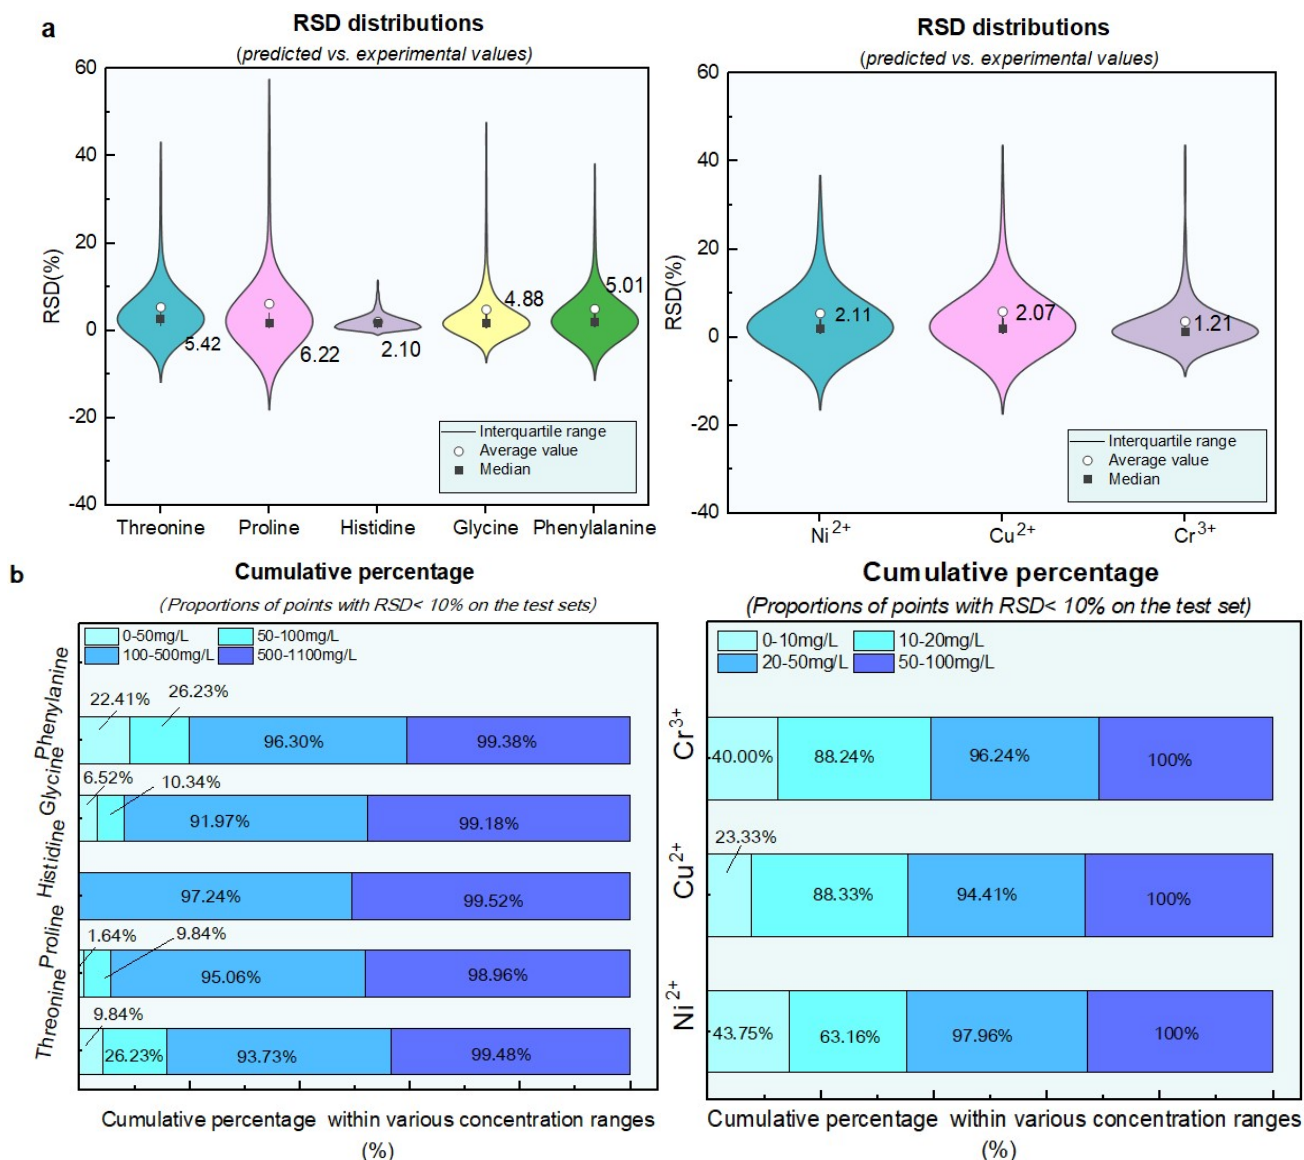

**Figure S6** Distribution of relative standard deviation (RSD) between predicted vs. experimental values. **(a)** Violin plot of the RSD on five amino acids and ternary heavy metal ions. **(b)** Cumulative RSD on various concentration ranges of five amino acids and ternary heavy metal ions.

**Table S1** List of chromogenic reagents

| Entry | Description                         | Formula                                                                               |
|-------|-------------------------------------|---------------------------------------------------------------------------------------|
| 1     | Coomassie Brilliant Blue (CBB-G250) | 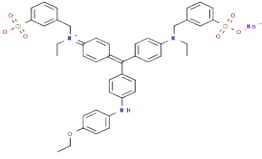    |
| 2     | Bromocresol Green (BCG)             |    |
| 3     | Methyl Red (MR)                     |    |
| 4     | Bromothymol Blue (BTB)              |   |
| 5     | Aluminon                            |  |
| 6     | Naphthol Green                      |  |
| 7     | Eriochrome Black T                  |  |
| 8     | Nitroso-R Salt                      |                                                                                       |
| 9     | Xylenol Orange                      |  |
| 10    | Chrome Azurol-S (CAS)               |  |



**Table S2** List of four mixed systems

| Entry                                                                     | Description                                          | pH | Working Conc.<br>(g/L) | Temperature<br>(°C) |
|---------------------------------------------------------------------------|------------------------------------------------------|----|------------------------|---------------------|
| System I: 3-dimensional pollutant samples (bulk solution: water)          |                                                      |    |                        |                     |
| 1                                                                         | NiSO <sub>4</sub> ·6H <sub>2</sub> O                 | 3  | 1                      | 25                  |
| 2                                                                         | Cu(NO <sub>3</sub> ) <sub>2</sub> ·3H <sub>2</sub> O | 3  | 1                      | 25                  |
| 3                                                                         | CrCl <sub>3</sub> ·6H <sub>2</sub> O                 | 3  | 1                      | 25                  |
| System II: 8-dimensional amino acid samples (bulk solution: water)        |                                                      |    |                        |                     |
| 1                                                                         | Alanine                                              | 8  | 20                     | 25                  |
| 2                                                                         | Glycine                                              | 8  | 20                     | 25                  |
| 3                                                                         | Cysteine                                             | 8  | 20                     | 25                  |
| 4                                                                         | Threonine                                            | 8  | 20                     | 25                  |
| 5                                                                         | Arginine                                             | 8  | 20                     | 25                  |
| 6                                                                         | Proline                                              | 8  | 20                     | 25                  |
| 7                                                                         | Phenylalanine                                        | 8  | 20                     | 25                  |
| 8                                                                         | Histidine                                            | 8  | 20                     | 25                  |
| System III: 5-dimensional amino acid samples (bulk solution: human urine) |                                                      |    |                        |                     |
| 1                                                                         | Threonine                                            | 8  | 20                     | 25                  |
| 2                                                                         | Proline                                              | 8  | 20                     | 25                  |
| 3                                                                         | Histidine                                            | 8  | 20                     | 25                  |
| 4                                                                         | Glycine                                              | 8  | 20                     | 25                  |
| 5                                                                         | Phenylalanine                                        | 8  | 20                     | 25                  |
| System IV: 3-dimensional pollutant samples (bulk solution: soil solution) |                                                      |    |                        |                     |
| 1                                                                         | NiSO <sub>4</sub> ·6H <sub>2</sub> O                 | 3  | 1                      | 25                  |
| 2                                                                         | Cu(NO <sub>3</sub> ) <sub>2</sub> ·3H <sub>2</sub> O | 3  | 1                      | 25                  |
| 3                                                                         | CrCl <sub>3</sub> ·6H <sub>2</sub> O                 | 3  | 1                      | 25                  |

All the working concentrations of heavy metal solutions refers to the metal atom concentrations.

**Table S3** Shooting parameters

| Image parameters  |                   |                       |                     |             |
|-------------------|-------------------|-----------------------|---------------------|-------------|
| Image resolution  | Bit depth         | Horizontal resolution | Vertical resolution | Color model |
| 1280×720          | 24                | 600 dpi               | 600 dpi             | RGB         |
| Camera parameters |                   |                       |                     |             |
| Recording time    | Private int width | Private int height    | Video bit rate      | Refocus     |
| 4 min             | 1280              | 720                   | 1080 kbps           | 30 fps      |

**Table S4** Background values of the target free amino acids and heavy metals in real samples

| 5 amino acids in urine solution (mg L <sup>-1</sup> ) |      |        |       |       |
|-------------------------------------------------------|------|--------|-------|-------|
| Thr                                                   | Pro  | His    | Gly   | L-Phe |
| -                                                     | -    | 215.65 | 13.87 | 3.42  |
| 3 heavy metals in soil solution (mg L <sup>-1</sup> ) |      |        |       |       |
|                                                       | Ni   | Cu     | Cr    |       |
|                                                       | 0.03 | 0.14   | 0.02  |       |

**Table S5** Detailed architecture of CNNs

| <b>Google Inception v1 CNN</b> |                                    |                      |
|--------------------------------|------------------------------------|----------------------|
| <b>Layer</b>                   | <b>Layer(type)</b>                 | <b>Output Shape</b>  |
| 0                              | Input Layer                        | (None, 224,224,3)    |
| 1                              | Convolution Layer                  | (None, 112,112,64)   |
| 2                              | Relu function                      | (None, 112,112,64)   |
| 3                              | Padding Layer                      | (None, 113, 113, 64) |
| 4                              | Max Pooling Layer                  | (None, 56, 56, 64)   |
| 5                              | Local Response Normalization Layer | (None, 56, 56, 64)   |
| 6                              | Convolution Layer                  | (None, 56, 56, 64)   |
| 7                              | Relu function                      | (None, 56, 56, 64)   |
| 8                              | Convolution Layer                  | (None, 56, 56, 192)  |
| 9                              | Relu function                      | (None, 56, 56, 192)  |
| 10                             | Local Response Normalization Layer | (None, 56, 56, 192)  |
| 11                             | Max Padding Layer                  | (None, 57, 57, 192)  |
| 12                             | Pooling Layer                      | (None, 28, 28, 192)  |
| 13                             | Inception_Net Graph                | (None, 28, 28, 256)  |
| 14                             | Inception_Net Graph                | (None, 28, 28, 480)  |
| 15                             | Padding Layer                      | (None, 29, 29, 480)  |
| 16                             | Max Pooling Layer                  | (None, 14, 14, 480)  |
| 17                             | Inception_Net Graph                | (None, 14, 14, 512)  |
| 18                             | Inception_Net Graph                | (None, 14, 14, 512)  |
| 19                             | Inception_Net Graph                | (None, 14, 14, 512)  |
| 20                             | Inception_Net Graph                | (None, 14, 14, 528)  |
| 21                             | Inception_Net Graph                | (None, 14, 14, 832)  |
| 22                             | Padding Layer                      | (None, 15, 15, 832)  |
| 23                             | Max Pooling Layer                  | (None, 7, 7, 832)    |
| 24                             | Inception_Net Graph                | (None, 7, 7, 832)    |
| 25                             | Inception_Net Graph                | (None, 7, 7, 1024)   |
| 26                             | Max Pooling Layer                  | (None, 1, 1, 1024)   |
| 27                             | Dropout Layer                      | (None, 1, 1, 1024)   |
| 28                             | Flatten Layer                      | (None, 1024)         |
| 29                             | Linear Layer                       | (None, 1000)         |
| 30                             | Ramp                               | (None, 1000)         |
| 31                             | Linear Layer                       | (None, X)            |
| 32                             | Output                             | (None, X)            |

**RestNet-50**

| <b>Layer</b> | <b>Layer(type)</b>        | <b>Output Shape</b>  |
|--------------|---------------------------|----------------------|
| 0            | Input Layer               | (None, 224, 224, 3)  |
| 1            | Convolution Layer         | (None, 112, 112, 64) |
| 2            | Batch Normalization Layer | (None, 112, 112, 64) |
| 3            | Ramp                      | (None, 112, 112, 64) |
| 4            | Padding Layer             | (None, 113, 113, 64) |
| 5            | Pooling Layer             | (None, 56, 56, 64)   |

|    |                     |                      |
|----|---------------------|----------------------|
| 6  | NetGraph (12 nodes) | (None, 56, 56, 256)  |
| 7  | NetGraph (10 nodes) | (None, 56, 56, 256)  |
| 8  | NetGraph (10 nodes) | (None, 56, 56, 256)  |
| 9  | NetGraph (12 nodes) | (None, 28, 28, 512)  |
| 10 | NetGraph (10 nodes) | (None, 28, 28, 512)  |
| 11 | NetGraph (10 nodes) | (None, 28, 28, 512)  |
| 12 | NetGraph (10 nodes) | (None, 28, 28, 512)  |
| 13 | NetGraph (12 nodes) | (None, 14, 14, 1024) |
| 14 | NetGraph (10 nodes) | (None, 14, 14, 1024) |
| 15 | NetGraph (10 nodes) | (None, 14, 14, 1024) |
| 16 | NetGraph (10 nodes) | (None, 14, 14, 1024) |
| 17 | NetGraph (10 nodes) | (None, 14, 14, 1024) |
| 18 | NetGraph (10 nodes) | (None, 14, 14, 1024) |
| 19 | NetGraph (12 nodes) | (None, 7, 7, 2048)   |
| 20 | NetGraph (10 nodes) | (None, 7, 7, 2048)   |
| 21 | NetGraph (10 nodes) | (None, 7, 7, 2048)   |
| 22 | Pooling Layer       | (None, 1, 1, 2048)   |
| 23 | Flatten Layer       | Vector (None, 2048)  |
| 24 | Linear Layer        | Vector (None, 1000)  |
| 25 | Ramp                | Vector (None, 1000)  |
| 26 | Linear Layer        | Vector (None, X)     |
| 27 | Output              | Vector (None, X)     |

---

### SqueezeNet V1.1

---

| Layer | Layer(type)        | Output Shape         |
|-------|--------------------|----------------------|
| 0     | Input Layer        | (None, 227, 227, 3)  |
| 1     | Convolution Layer  | (None, 113, 113, 64) |
| 2     | Ramp               | (None, 113, 113, 64) |
| 3     | Pooling Layer      | (None, 56, 56, 64)   |
| 4     | NetGraph (7 nodes) | (None, 56, 56, 128)  |
| 5     | NetGraph (7 nodes) | (None, 56, 56, 128)  |
| 6     | Padding Layer      | (None, 57, 57, 128)  |
| 7     | Pooling Layer      | (None, 28, 28, 128)  |
| 8     | NetGraph (7 nodes) | (None, 28, 28, 256)  |
| 9     | NetGraph (7 nodes) | (None, 28, 28, 256)  |
| 10    | Padding Layer      | (None, 29, 29, 256)  |
| 11    | Pooling Layer      | (None, 14, 14, 256)  |
| 12    | NetGraph (7 nodes) | (None, 14, 14, 384)  |
| 13    | NetGraph (7 nodes) | (None, 14, 14, 384)  |
| 14    | NetGraph (7 nodes) | (None, 14, 14, 512)  |
| 15    | NetGraph (7 nodes) | (None, 14, 14, 512)  |
| 16    | Dropout Layer      | (None, 14, 14, 512)  |
| 17    | Convolution Layer  | (None, 14, 14, 1000) |
| 18    | Ramp               | (None, 14, 14, 1000) |
| 19    | Aggregation Layer  | (None, 1000)         |
| 20    | Flatten Layer      | (None, 1000)         |
| 21    | Ramp               | (None, 1000)         |
| 22    | Linear Layer       | (None, X)            |



**LeNet-5**

| <b>Layer</b> | <b>Layer(type)</b> | <b>Output Shape</b> |
|--------------|--------------------|---------------------|
| 0            | Input Layer        | (None, 28, 28, 3)   |
| 1            | Convolution Layer  | (None, 40, 40, 20)  |
| 2            | Ramp Layer         | (None, 40, 40, 20)  |
| 3            | Pooling Layer      | (None, 12, 12, 20)  |
| 4            | Convolution Layer  | (None, 8, 8, 50)    |
| 5            | Ramp Layer         | (None, 8, 8, 50)    |
| 6            | Pooling Layer      | (None, 4, 4, 50)    |
| 7            | Flatten Layer      | (None, 800)         |
| 8            | Linear Layer       | (None, 500)         |
| 9            | Ramp Layer         | (None, 500)         |
| 10           | Linear Layer       | (None, X)           |
| 11           | Output             | (None, X)           |

X represents the mixture dimension of output vectors, and its value is as follows: 3, 5 or 8. Besides, all datasets used for training and test the models can be publicly downloaded at

<https://github.com/Jianchaoleesnnu/Image-Dataset-from-Complex-Chemistry> without any restriction.
